# Supplementary material
Source: MDPI journal article supplement (https://www.mdpi.com/2073-4352/12/6/767)
Supplement: s1 [file s1]

## Supplementary Information for

### Bias-Voltage Dependence of Tunneling Decay Coefficient and Barrier Height in Arylalkane Molecular Junctions with Graphene Contacts as a Protecting Interlayer

**Table S1.** Comparison of various non-evaporative top contact molecular junctions based on self-assembled monolayers.

| top contact method                  | junction structure         | yield        | maximun junction area<br>( $\mu\text{m}^2$ ) | decay coefficient ( $\beta$ )<br>( $\text{\AA}^{-1}$ ) | ref        |
|-------------------------------------|----------------------------|--------------|----------------------------------------------|--------------------------------------------------------|------------|
| transferred SLG <sup>1)</sup>       | SLG/arylalkane/SLG         | >80%         | $6.3 \times 10^4$                            | 1.08 - 0.92                                            | this study |
| liquid EGaIn                        | SLG/alkylamine/EGaIn       | 93%          | $1.9 \times 10^3$                            | 0.82                                                   | S1         |
| transferred rGO <sup>2)</sup>       | Au/alkanethiol/rGO         | not reported | $\sim 4$                                     | 0.5                                                    | 17         |
| spin-coated PEDOT:PSS <sup>3)</sup> | Au/alkanedithiol/PEDOT:PSS | >95%         | $\sim 1.0 \times 10^4$                       | 0.57 - 0.66                                            | 11         |
| Au NP <sup>4)</sup> solution        | Au/alkanethiol/Au NP       | >95%         | $4.9 \times 10^3$                            | 0.81                                                   | S2         |
| direct metal transfer               | Au/alkanethiol/Au          | $\sim 70\%$  | $\sim 79$                                    | 1.1                                                    | 13         |
| transferred MLG <sup>5)</sup>       | Au/alkane(di)thiol/MLG     | $\sim 90\%$  | $\sim 16$                                    | 0.85                                                   | 15         |
| transferred SLG                     | SLG/arylalkane/SLG         | >80%         | $9.0 \times 10^4$                            | 0.54 <sup>6)</sup>                                     | 16         |

<sup>1)</sup> single layer graphene

<sup>2)</sup> reduced graphene oxide

<sup>3)</sup> poly(3,4-ethylenedioxythiophene)-poly(styrenesulfonate)

<sup>4)</sup> nanoparticle

<sup>5)</sup> multilayer graphene

<sup>6)</sup> this low  $\beta$  value may be due to rough substrate.

As summarized in table S1, the single layer graphene top contact effectively protects the molecular SAMs from penetration by the evaporated metal atoms, providing stable and high yield molecular junctions for investigating the intrinsic molecular charge transport. We also demonstrated the validation of the voltage-induced barrier lowering approximation to the graphene-based molecular junction as presented in this study.

The original Simmons model for molecular tunnel junctions is given by eq. (S1) [18,22]:

$$J = \frac{e}{4\pi^2 \hbar d^2} \left\{ \left( \Phi_B - \frac{eV}{2} \right) \exp \left( -\frac{2d\sqrt{2m}}{\hbar} \alpha \sqrt{\Phi_B - \frac{eV}{2}} \right) - \left( \Phi_B + \frac{eV}{2} \right) \exp \left( -\frac{2d\sqrt{2m}}{\hbar} \alpha \sqrt{\Phi_B + \frac{eV}{2}} \right) \right\} \quad (\text{S1})$$

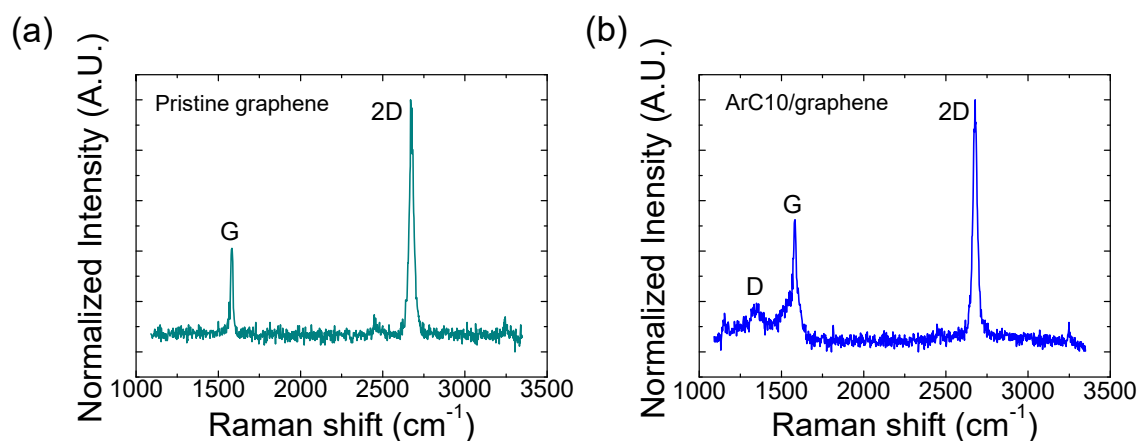

**Figure S1.** Raman spectrum for (a) a pristine and (b) ArC10-covered graphene on Si/SiO<sub>2</sub> substrate.

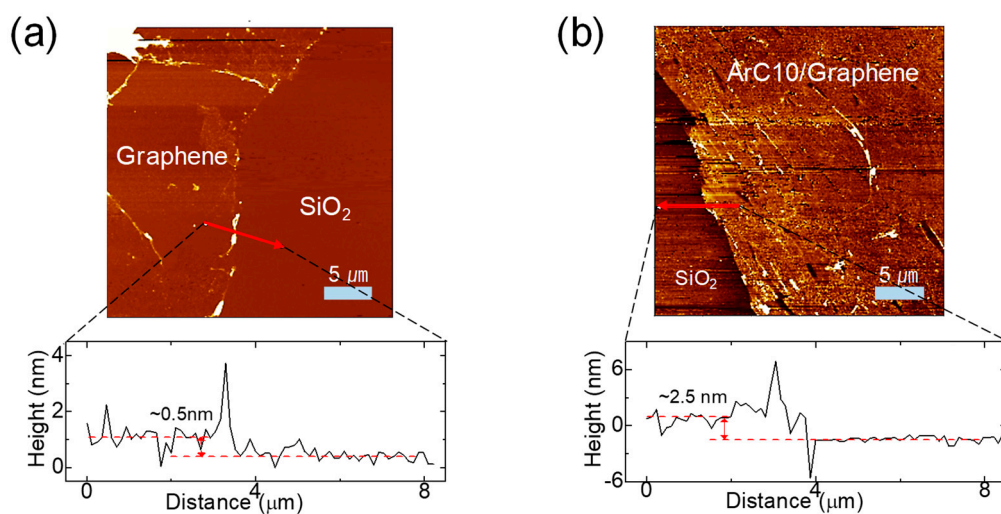

**Figure S2.** AFM topographical images and line profile analyses of (a) a pristine and (b) ArC10-covered graphene on Si/SiO<sub>2</sub> substrate. The heights of a pristine and ArC10-covered graphene are estimated to be 2.5 nm and 0.5 nm, respectively.

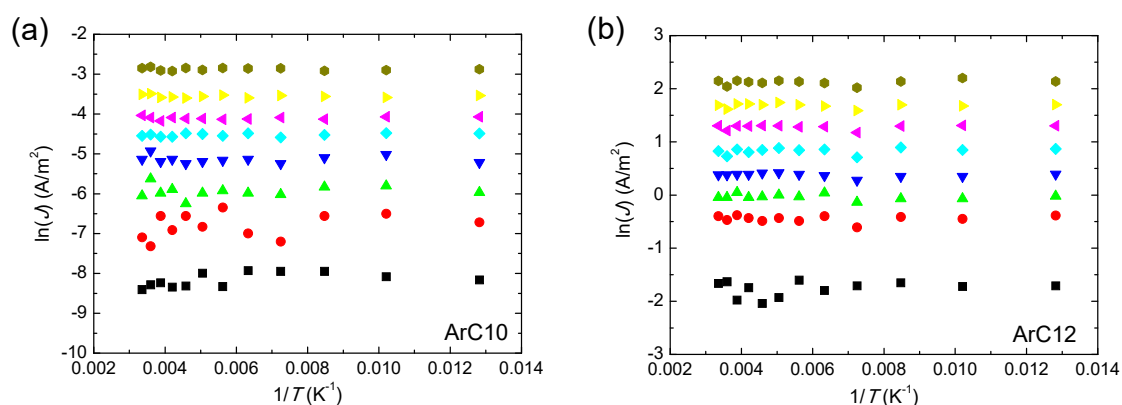

**Figure S3.** Arrhenius plots of (a) ArC10 and (b) ArC12 junctions. Temperature variation is from 298 to 78 K in 20 K steps at voltages from 0.1 V (bottom points) to 1.5 V (top points) with 0.2 V steps.

## References

- S1. Song, P.; Sangeeth, C.S.S.; Thompson, D.; Du, W.; Loh, K.P.; Nijhuis, C.A. Noncovalent Self-Assembled Monolayers on Graphene as a Highly Stable Platform for Molecular Tunnel Junctions. *Adv. Mater.* 2016, 28, 631-639.
- S2. Puebla-Hellmann, G.; Venkatesan, K.; Mayor, M.; Lörtscher, E. Metallic nanoparticle contacts for high-yield, ambient-stable molecular-monolayer devices. *Nature* 2018, 559, 232–235.
